# Supplementary material
Source: PubMed Central journal article supplement (PMC6518891)
Supplement: 2018.201160.ROTORDAM_SUPPL.pdf [file 2018.201160.ROTORDAM_SUPPL.pdf]

**A novel gain-of-function mutation of Piezo1 is functionally affirmed in red blood cells by high-throughput patch clamp**

*Maria G. Rotordam,<sup>1,2</sup> Elisa Fermo,<sup>3</sup> Nadine Becker,<sup>2</sup> Wilma Barcellini,<sup>3</sup> Andrea Brüggemann,<sup>2</sup> Niels Fertig,<sup>2</sup> Stéphane Egée,<sup>4,5</sup> Markus Rapedius<sup>2\*</sup> Paola Bianchi<sup>3,\*</sup> and Lars Kaestner<sup>1,6,\*</sup>*

*<sup>1</sup>Saarland University, Theoretical Medicine and Biosciences, Homburg/Saar, Germany; <sup>2</sup>Nanon Technologies GmbH, Munich, Germany; <sup>3</sup>UOC Ematologia, UOS Fisiopatologia delle Anemie, Fondazione IRCCS Ca' Granda Ospedale Maggiore Policlinico, Milano, Italy; <sup>4</sup>Sorbonne Université, CNRS, UMR 8227, Integrative Biology of Marine Models, Station Biologique de Roscoff, Roscoff Cedex, France; <sup>5</sup>Laboratoire d'Excellence GR-Ex, Paris, France and <sup>6</sup>Saarland University, Experimental Physics, Saarbrücken, Germany*

*PB and LK contributed equally to this work.*

*Correspondence: MARKUS RAPEDIUS.  
PAOLO BIANCHI. LARS KAESTNER.  
Markus.Rapedius@nanion.de.  
paola.bianchi@policlinico.mi.it  
lars\_kaestner@me.com  
doi:10.3324/haematol.2018.201160*

## **A novel gain-of-function mutation of Piezo1 is functionally affirmed in red blood cells by high-throughput patch clamp**

*Giustina M. Rotordam*<sup>1,2</sup>, *Elisa Fermo*<sup>3</sup>, *Nadine Becker*<sup>2</sup>, *Wilma Barcellini*<sup>3</sup>, *Andrea Brüggemann*<sup>2</sup>, *Niels Fertig*<sup>2</sup>, *Stéphane Egée*<sup>4,5</sup>, *Markus Rapedius*<sup>2,\*</sup>, *Paola Bianchi*<sup>3,#,\*</sup>, *Lars Kaestner*<sup>1,6,#,\*</sup>

1 – Saarland University, Theoretical Medicine and Biosciences, Homburg/Saar, Germany

2 – Nanion Technologies GmbH, Munich, Germany

3 – UOC Ematologia, UOS Fisiopatologia delle Anemie, Fondazione IRCCS Ca' Granda Ospedale Maggiore Policlinico, Milano, Italy

4 – Sorbonne Université, CNRS, UMR 8227, Integrative Biology of Marine Models, Station Biologique de Roscoff, CS 90074, 29688 Roscoff Cedex, France

5 – Laboratoire d'Excellence GR-Ex, Paris, France

6 – Saarland University, Experimental Physics, Saarbrücken, Germany

# - equal contribution

\* correspondence to [Markus.Rapedius@nanion.de](mailto:Markus.Rapedius@nanion.de), [paola.bianchi@policlinico.mi.it](mailto:paola.bianchi@policlinico.mi.it) or to [lars\\_kaestner@me.com](mailto:lars_kaestner@me.com)

## **Supplemental Material**

### **Materials and Methods**

#### **Molecular analysis**

The DNA sample of the patient was analysed on an NGS-targeted panel SureDesign software (Agilent Technologies, Santa Clara, USA), containing 40 genes associated with congenital haemolytic anaemia (Supplemental Table S1). Libraries were obtained by HaloPlexHS Target Enrichment System Kit and sequenced on a MiSeq platform (Illumina, San Diego, USA). Only the causative mutation R2110W in *PIEZO1* gene was detected in exon 44. Sanger sequencing was performed on an ABI310 DNA Analyser (Applied Biosystems, Foster City, CA, USA). The novel variant was considered pathogenetic according to the guidelines of the American College of Medical Genetics. Prediction was made according to the following algorithms: SIFT; PolyPhen-2; VarSome; MutationTaster; PredictSNP. MAF was based on the following databases: ExAc; 1000G.

## Cell culture and harvesting

Neuro2A (N2A) mouse neuroblastoma cell line was kindly provided by Max Delbrück Centre (Berlin, Germany). Frozen stocks were thawed following the manufacturer's instructions, cultured for at least 4 days after thawing and used on the automated patch clamp systems 4 to 10 days after plating. Human red blood cells (RBCs) were freshly obtained from the fingertips of the experimenter (healthy volunteer) upon written informed consent and suspended in physiological  $\text{Ca}^{2+}$ -free external solution. *PIEZO1*-mutated (R2110W) and control blood samples were shipped overnight from Milan (Italy) to Munich (Germany) to enable recordings within 24h after blood withdrawal. Samples were shipped in heparin-coated tubes at 4°C.

## Patch clamp solutions

For automated patch clamp of all cell types, internal solution contained (in mM): 10 KCl, 110 KF, 10 NaCl, 10 EGTA and 10 HEPES/KOH (pH 7.2). External recording solution contained in mM: 140 NaCl, 4 KCl, 2  $\text{CaCl}_2$ , 1  $\text{MgCl}_2$ , 5 Glucose and 10 HEPES/NaOH (pH 7.4). Yoda1 (10  $\mu\text{M}$ ; Sigma-Aldrich),  $\text{GdCl}_3$  (30  $\mu\text{M}$ ; Sigma-Aldrich) and TRAM-34 (500 nM; Sigma-Aldrich) were prepared in external recording solution.

## Automated patch clamp recordings

Whole-cell recordings were carried out on the SyncroPatch 384PE (Nanion Technologies, Munich, Germany). The SyncroPatch 384PE used in this work consists of an automated patch clamp module in combination with a 384-channel digital amplifier (Tecella, Foothill Ranch, CA), a CyBio FeliX (AnalytikJena, Jena, Germany) pipetting robot with a 384 pipettor arm and proprietary softwares for data acquisition (PatchControl 384, Nanion Technologies) and data analysis (DataControl 384, Nanion Technologies). All recordings were performed at room temperature using planar borosilicate glass patch clamp chips (Fertig et al., 2002) in a 384-microtiter-plate format with medium (3-5  $\text{M}\Omega$  for N2A cells) and ultra-high (9-12  $\text{M}\Omega$  for RBCs) resistances. Prior to the electrophysiological measurements, N2A cells were detached by accutase treatment (5-10 min), washed with culture medium and adjusted to a final density of  $2 \times 10^5$  cells/ml. Whole blood from fresh control, shipped control and Piezo1 patient samples was suspended in  $\text{Ca}^{2+}$ -free external solution to a final haematocrit of ~0.05% for fresh control and ~0.5% for shipped control and patient samples. Cell suspensions were kept in the dedicated cell reservoir at 10°C and used for no longer than 2 h. Currents were elicited using voltage-ramps from -100 to +80 mV with 300 ms duration. Initial tests to investigate Piezo1 channels via mechanical stimulation, i.e. pressure steps or fluid shear stress, failed to activate the current in several attempts. We therefore assumed no or very little contribution of mechanical activation of Piezo1 in our recordings. Piezo1 channel investigation in both N2A and RBCs was performed using a Piezo1 chemical specific agonist, Yoda1 (Syeda et al., 2015) and  $\text{GdCl}_3$  as a non-selective stretch-activated channel inhibitor. To investigate Gardos current contribution to the Yoda1-activated currents in RBCs, TRAM-34 (Gardos specific inhibitor) was applied along with the external washing solution and kept for the duration of the experiment. The resulting currents were tested with Yoda1 and blocked by  $\text{GdCl}_3$ .

## References

Fertig N, Blick RH, Behrends, JC, Whole cell patch clamp recording performed on a planar glass chip. *Biophysj.* 2002. 82, 3056–3062.

Syeda R, Xu J, Dubin AE, Coste B, Mathur J, Huynh T, et al. Chemical activation of the mechanotransduction channel Piezo1. *Elife.* 2015;4.

**Supplemental Table 1:** Clinical and haematological data at the time of the study

|                                          | <b>Patient R2110W</b> | <b>Reference values</b> |
|------------------------------------------|-----------------------|-------------------------|
| <b>Age (years)</b>                       | 43                    |                         |
| <b>Transfusions</b>                      | no                    |                         |
| <b>Splenomegaly</b>                      | no                    |                         |
| <b>Hb (g/dL)</b>                         | 16.9                  | 13.4-17.5               |
| <b>MCV (fL)</b>                          | 80.9                  | 80-94                   |
| <b>MCHC (g/dL)</b>                       | 39.1                  | 31-37                   |
| <b>Reticulocytes (x10<sup>9</sup>/L)</b> | 193                   | 20-100                  |
| <b>RBCs morphology</b>                   | 7% stomatocytes       |                         |
| <b>Unconj. bilirubin (mg/dL)</b>         | 0.66                  | <1                      |
| <b>Serum ferritin (ng/mL)</b>            | 546                   | 30-400                  |
| <b>AGLT</b>                              | >900                  | >900                    |
| <b>Pink test</b>                         | 7                     | 11-33                   |
| <b>NaCl osmotic fragility</b>            | decreased             |                         |
| <b>EMA binding test</b>                  | normal                |                         |

**Supplemental Table 2:** Genes associated with congenital haemolytic anemias investigated through a 40 genes-targeted Next Generation Sequencing panel.

| <b>Gene</b>     | <b>Ref. Sequence</b> | <b>Gene</b>     | <b>Ref. Sequence</b> |
|-----------------|----------------------|-----------------|----------------------|
| <b>ABCB6</b>    | NM_005689            | <b>GSS</b>      | NM_000178            |
| <b>ABCG5</b>    | NM_022436            | <b>HK1</b>      | NM_033497            |
| <b>ABCG8</b>    | NM_022437            | <b>KCNN4</b>    | NM_002250            |
| <b>ALAS2</b>    | NM_001037967         | <b>KIF23</b>    | NM_138555.2          |
| <b>AK1</b>      | NM_000476            | <b>KLF1</b>     | NM_006563.3          |
| <b>ALDOA</b>    | NM_000034            | <b>NT5C3A</b>   | NM_016489.12         |
| <b>BPGM</b>     | NM_001293085         | <b>PFKL</b>     | NM_001002021         |
| <b>C15ORF41</b> | NM_001130010         | <b>PFKM</b>     | NM_000289.5          |
| <b>CDAN1</b>    | NM_138477            | <b>PGK1</b>     | NM_000291.3          |
| <b>CYB5R3</b>   | NM_000398            | <b>PGM1</b>     | NM_001172819         |
| <b>ENO1</b>     | NM_001201483         | <b>PKLR</b>     | NM_000298.5          |
| <b>EPB41</b>    | NM_004437.3          | <b>PIEZO1</b>   | NM_001142864.2       |
| <b>EPB42</b>    | NM_000119.2          | <b>RHAG</b>     | NM_000324.2          |
| <b>G6PD</b>     | NM_000402            | <b>SEC23B</b>   | NM_006363.4          |
| <b>GATA1</b>    | NM_002049            | <b>SLC2A1</b>   | NM_006516            |
| <b>GCLC</b>     | NM_001498.3          | <b>SLC4A1</b>   | NM_000342.3          |
| <b>GCLM</b>     | NM_001308253         | <b>SLC25A38</b> | NM_017875.2          |
| <b>GPI</b>      | NM_000175.3          | <b>SPTA1</b>    | NM_003126.2          |
| <b>GPX1</b>     | NM_000581.2          | <b>SPTB</b>     | NM_000347.5          |
| <b>GSR</b>      | NM_000637            | <b>TPI1</b>     | NM_000365.5          |

**Supplemental Table 3: Quality Control (QC) filters implemented to determine Yoda1 responder and non-responder cells.** Piezo1-activated N2A cells and RBCs were selected based on the listed criteria to divide the cells as Yoda1 responders and Yoda1 non-responders. Inf stands for infinite.

|                             | Quality Control filters         | N2A cells   |              | RBCs        |              |
|-----------------------------|---------------------------------|-------------|--------------|-------------|--------------|
|                             |                                 | lower value | higher value | lower value | higher value |
| <b>Seal resistance (MΩ)</b> | <b>cell catch</b>               | 5           | Inf          | 5           | Inf          |
|                             | <b>whole-cell</b>               | 50          | Inf          | 50          | Inf          |
|                             | <b>before compound addition</b> | 500         | Inf          | 900         | Inf          |
|                             | <b>end of the experiment</b>    | 500         | Inf          | 1500        | Inf          |
| <b>Current (pA)</b>         | <b>inward current values</b>    | -Inf        | -20          | -Inf        | -20          |
|                             | <b>outward current values</b>   | 16          | Inf          | 16          | Inf          |
|                             | <b>GdCl<sub>3</sub> block</b>   | 20%         | -            | 20%         | -            |
|                             | <b>Yoda1 responders</b>         | 20%         | -            | 20%         | -            |

**A**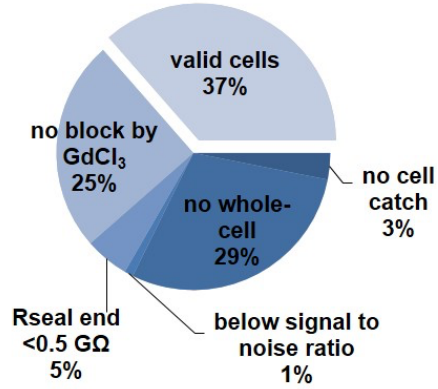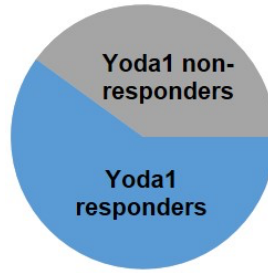**B**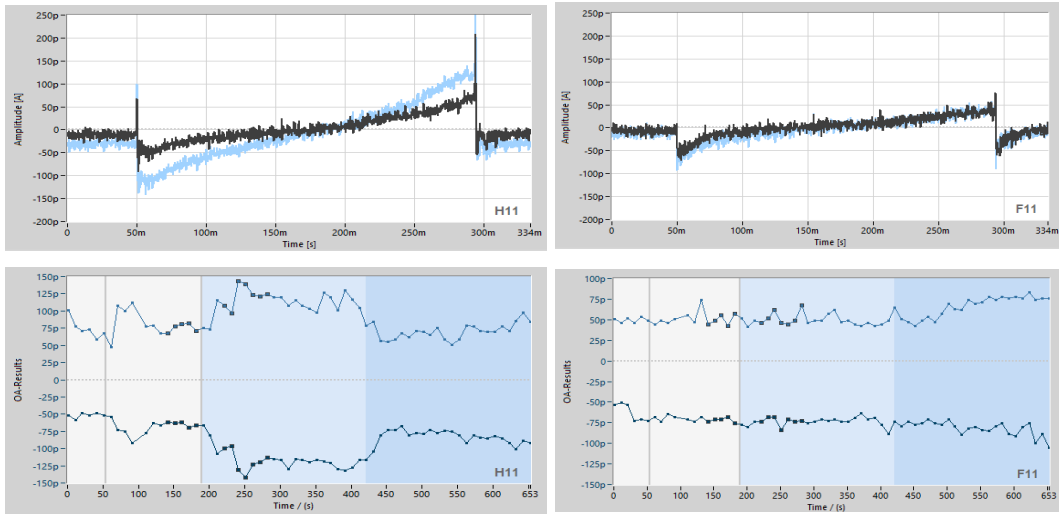**C**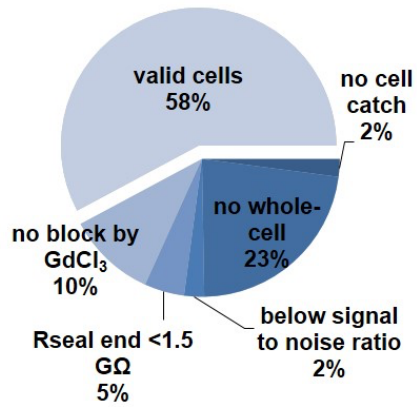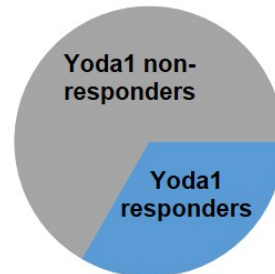**D**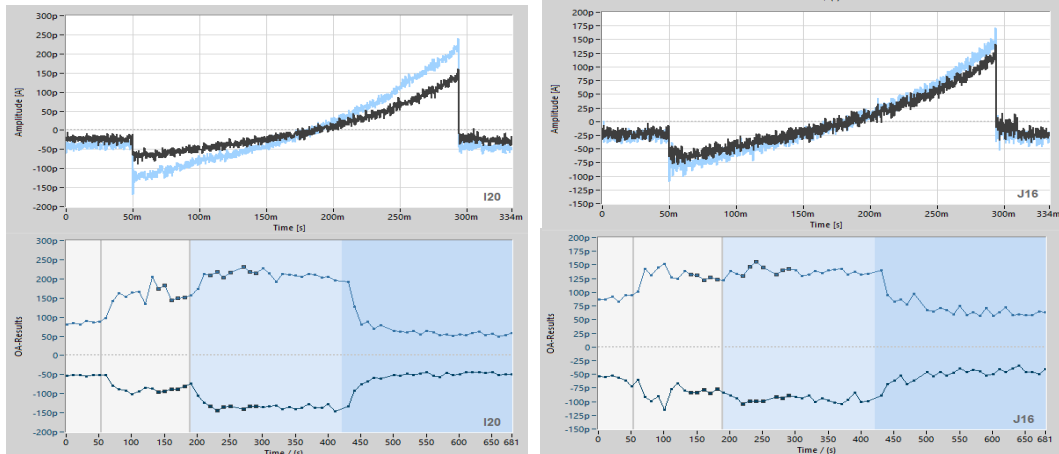

**Supplemental Figure S1: Typical recording from Piezo1 endogenously expressed in N2A cells and in healthy human RBCs on the SyncroPatch 384PE.** (A) Percentage of valid cells obtained following application of the QC filters listed in Supplemental Table 2 in one example NPC-384 chip. 140 out of 384 N2A cells (37%) passed the QC criteria and 85 cells (60% of the valid cells) were considered as Yoda1 responders. (B) Example of Yoda1 responder (left graph) and non-responder (right graph) N2A cells. Top: raw data trace of a single well recorded in external solution (black trace) and in the presence of 10  $\mu\text{M}$  Yoda1 (light blue trace). Bottom: Online Analysis plot showing the positive and negative peak currents over time. Vertical lines indicate solution additions, white areas mark external (wash) solution, light blue marks 10  $\mu\text{M}$  Yoda1, blue marks 30  $\mu\text{M}$  GdCl<sub>3</sub>. An average of the data points highlighted in the plot is used for the analysis. (C) Percentage of valid cells obtained following application of the QC filters in one example NPC-384 chip. 262 out of 384 RBCs (58%) passed the QC criteria and 74 cells (33% of the valid cells) were considered as Yoda1 responders. (D) Example of Yoda1 responder (left graph) and non-responder (right graph) RBCs. Top: raw data trace of a single well recorded in external solution (black trace) and in the presence of 10  $\mu\text{M}$  Yoda1 (light blue trace). Bottom: Online Analysis plot showing the positive and negative peak currents over time. Vertical lines indicate solution additions, white areas mark external (wash) solution, light blue marks 10  $\mu\text{M}$  Yoda1, blue marks 30  $\mu\text{M}$  GdCl<sub>3</sub>. An average of the data points highlighted in the plot is used for the analysis.

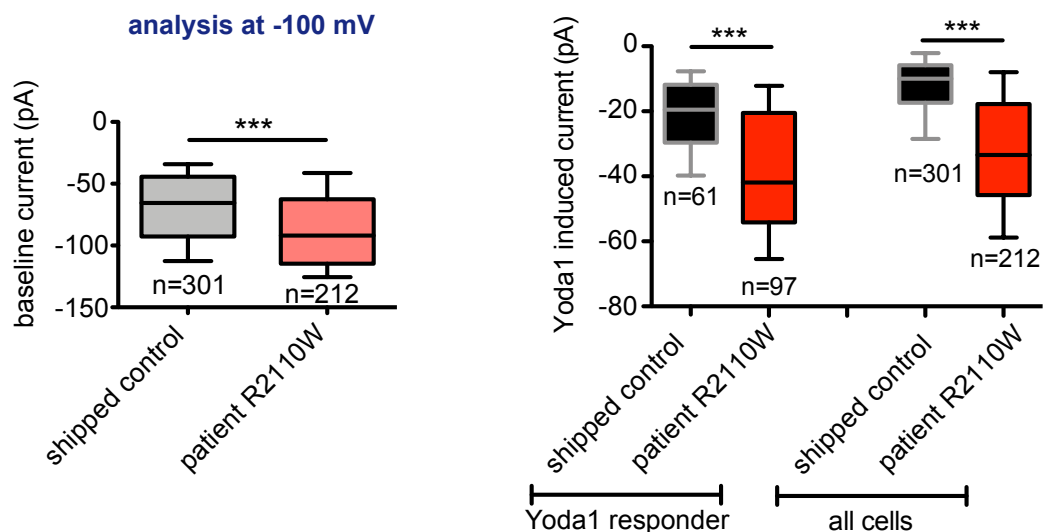

**Supplemental Figure S2: Additional statistical analysis of recordings from cells with PIEZO1 mutation (R2110W) cells compared to healthy human RBCs.** The voltage protocol was the same as described in Figure 2A, except the holding potential was set to -30 mV. Because the current amplitudes did not show a Gaussian distribution they were presented as median and box plots (25% - 75%) with whiskers (10% -90%) in patient cells compared to controls. The numbers adjacent to the boxes refer to the numbers of cells measured. Here analysis of negative -100 mV membrane potential is shown exclusively to complement the analysis at positive membrane potentials depicted in Figure 3C. Only the cells passing the quality control filters (Supplemental Figure 3) were processed. In control condition, 61 out of 301 RBCs (20% of the valid cells) were considered as Yoda1 responders. In patient condition, 97 out of 212 (46% of the valid cells) were considered as Yoda1 responders. The baseline values (left) were already indicating a highly significant difference between patient and control. A difference in the Yoda1-induced current was evident when considering only the cells responding to Yoda1 and was sustained when all measured RBCs were included.
