# Supplementary material
Source: PubMed Central journal article supplement (PMC6518891)
Supplement: 2018_201160-Disclosures_and_Contributions.pdf [file 2018_201160-Disclosures_and_Contributions.pdf]

Haematologica  
HAEMATOL/2018/201160  
Version 3

A novel gain-of-function mutation of Piezo1 is functionally affirmed in red blood cells by high-throughput patch clamp

Giustina M. Rotordam, Elisa Fermo, Nadine Becker, Wilma Barcellini, Andrea Brüggemann, Niels Fertig, Stéphane Egée, Markus Rapedius, Paola Bianchi, and Lars Kaestner

Disclosures: The research leading to these results has received funding from the European Seventh Framework Program under grant agreement number 602121 (CoMMiTMenT) to LK and the European Framework Horizon 2020 under grant agreement number 675115 (RELEVANCE) to AB, NF and LK. The study was also supported by Fondazione IRCCS Ca Granda Policlinico Milano, Project number RC 175/04, 2015–2017 (to PB). MGR, NB and MR are employees of Nanion Technologies GmbH, AB and NF are owners of Nanion Technologies GmbH.

Contributions: LK, PB and SE designed the study. PB, AB, NF and LK supervised the study. MGR, EF, NB, WB and MR performed research. MGR, EF, NB, WB, MR, PB and LK performed data analysis. LK, GMR, PB, EF, NB and MR wrote the manuscript and designed the figures. All authors revised the manuscript.
